# Supplementary material
Source: Springer Nature journal article supplement (https://www.springermedizin.de/resource/supplementary/12911_2010_384_MOESM1_ESM.pdf/9525762)
Supplement: MOESM1 [file 9525762]

## Graph structure including links to an incorrect hospital number

|                      |
|----------------------|
| 5170231111           |
|                      |
| Wilson, Dav 01011939 |

|                      |
|----------------------|
|                      |
| 4496644              |
| Wilson, Dav 14061940 |

|                     |
|---------------------|
| 4118890             |
|                     |
| Smith, Joh 03071988 |

|                      |
|----------------------|
|                      |
|                      |
| Wilson, Dav 23011969 |

|                      |
|----------------------|
| 3119004037           |
| 4118890              |
| Wilson, Dav 23011969 |

|                      |
|----------------------|
| 4118890              |
|                      |
| Wilson, Dav 23011969 |

|                      |
|----------------------|
| 3119004037           |
|                      |
| Wilson, Dav 23011969 |

## Graph structure without the links from the incorrect hospital number

|                      |
|----------------------|
| 5170231111           |
|                      |
| Wilson, Dav 01011939 |

|                      |
|----------------------|
|                      |
| 4496644              |
| Wilson, Dav 14061940 |

|                     |
|---------------------|
| <del>4118890</del>  |
|                     |
| Smith, Joh 03071988 |

|                      |
|----------------------|
|                      |
|                      |
| Wilson, Dav 23011969 |

|                      |
|----------------------|
| 3119004037           |
| 4118890              |
| Wilson, Dav 23011969 |

|                      |
|----------------------|
| 4118890              |
|                      |
| Wilson, Dav 23011969 |

|                      |
|----------------------|
| 3119004037           |
|                      |
| Wilson, Dav 23011969 |
